# Supplementary material
Source: PubMed Central journal article supplement (PMC3538032)
Supplement: NIHMS411189-supplement-Supplement.pdf [file NIHMS411189-supplement-Supplement.pdf]

## Supplementary Data

### Supplementary Table 1

|                    |                                 |
|--------------------|---------------------------------|
| MLANA <sup>S</sup> | 5'-GAGAAAAACTGTGAACCTGTGGT-3'   |
| MLANA <sup>A</sup> | 5'-GACTGTTCTGCAGAGAGTTTCTCAT-3' |
| ABC5 <sup>S</sup>  | 5'-CCCAAATTTTATTGTTGGATGA-3'    |
| ABC5 <sup>A</sup>  | 5'-AAGGGCATGCTGAACCAC-3'        |
| Pax3d <sup>S</sup> | 5'-GGCTACCAATATGGGCAGTATG-3'    |
| Pax3d <sup>A</sup> | 5'-AGGGCCAGTTTTAGCTCCA-3'       |
| MCAM <sup>S</sup>  | 5'-GGTACCCCATTCCTCAAGT-3'       |
| MCAM <sup>A</sup>  | 5'-CTGGGACGACTGAATGTGG-3'       |
| TGFβ2 <sup>S</sup> | 5'CCTGTAGCCCCATAACTTGG-3'       |
| TGFβ2 <sup>A</sup> | 5'-GAAAGCACGTGGCTCTTGTT-3'      |
| GAPDH <sup>S</sup> | 5'-GGGTGTGAACCATGAGAAGT-3'      |
| GAPDH <sup>A</sup> | 5'-GACTGTGGTCATGAGTCCT-3'       |

<sup>S</sup> Sense Primers all flanked an intron/exon boundary.

<sup>A</sup> Antisense

## Supplementary Table 2

|                    |                                  |
|--------------------|----------------------------------|
| MLANA <sup>S</sup> | 5'-AGTCTTACTGCTCATCGGCTGTTG -3'  |
| MLANA <sup>A</sup> | 5'-ACAGTTCATGTCCG TCAAGGTTCCG-3' |
| ABC5 <sup>S</sup>  | 5'-CTCTTCAACTGCAGCAT TGCTGAG-3'  |
| ABC5 <sup>A</sup>  | 5'- CCTCAACAGCATCACTGCACTGAC-3'  |
| Pax3d <sup>S</sup> | 5'-GGCTACAGTATGGACCCTG-3'        |
| Pax3d <sup>A</sup> | 5'-GGCTGCGAAGACCAGAAAC-3'        |
| MCAM <sup>S</sup>  | 5'- GTGAACAGTAAGGAGCCTGAGGAG-3'  |
| MCAM <sup>A</sup>  | 5'-GTTGG TTGTCTCCTCCTGCCTC-3'    |
| TGFβ2 <sup>S</sup> | 5'-GGTGAAGTGCTAGTATGCAAGTGG-3'   |
| TGFβ2 <sup>A</sup> | 5'-CCAGTGAAACTGACAGG CAAGTAG-3'  |
| GAPDH <sup>S</sup> | 5'-GGCTACCAATATGGGCAGTATG-3'     |
| GAPDH <sup>A</sup> | 5'-AGGGCCAGTTTTAGCTCCA-3'        |

<sup>S</sup> Sense Primers all flanked an intron/exon boundary.

<sup>A</sup> Antisense

Supplementary Table 3 – Generalised linear model analysis examining the effect of time on individual marker expression in serial blood collections.

| <b>Marker</b> | <b>Wald-Chi Square</b> | <b>p-value</b> |
|---------------|------------------------|----------------|
| MLANA         | 1.226                  | 0.268          |
| ABCB5         | 16.209                 | 0.000*         |
| Pax3d         | 0.499                  | 0.480          |
| MCAM          | 0.508                  | 0.476          |
| TGFβ2         | 0.310                  | 0.578          |

P-value\* - Generalised linear model analysis using binary logistics,  $p < 0.001$
